# Supplementary material
Source: PubMed Central journal article supplement (PMC6941425)
Supplement: NIHMS1063327-supplement-supporting_Materials.pdf [file NIHMS1063327-supplement-supporting_Materials.pdf]

## Supporting Information

### Exploiting CD22 to Selectively Tolerize Autoantibody Producing B-cells in Rheumatoid Arthritis

Kyle J. Bednar<sup>1,2</sup>, Corwin M. Nycholat<sup>3</sup>, Tadimeti S. Rao<sup>1</sup>, James C. Paulson<sup>2,3</sup>, Wai-Ping Fung-Leung<sup>1\*</sup>, and Matthew S. Macauley<sup>2,4\*</sup>

\* Authors with equal contributions

Institutional Addresses:

<sup>1</sup>Discovery Immunology, Janssen Pharmaceutical Research and Development, LLC. 3210 Merryfield Road, San Diego CA 92121

<sup>2</sup>Department of Molecular Medicine, The Scripps Research Institute, North Torrey Pines Road, La Jolla, CA 92037

<sup>3</sup>Department of Immunology and Microbial Sciences, The Scripps Research Institute, North Torrey Pines Road, La Jolla, CA 92037

<sup>4</sup>Current Address: Department of Chemistry, University of Alberta, 11227 Saskatchewan Dr NW, Edmonton, AB T6G 2G2, Alberta, Canada

Corresponding Authors: Matthew S. Macauley (macauley@ualberta.ca)

Wai-Ping Fung-Leung (wleung@its.jnj.com)

A)

| Patient ID  | Sex | Age | RF Titer | CCP | HAQ  |
|-------------|-----|-----|----------|-----|------|
| RA12Jun21D  | M   | 61  | 16       | 94  | 11.1 |
| BHR1243015* | M   | 57  |          | 300 |      |
| RA120912D*  | F   | 81  | 0        | 36  | 2.7  |
| RA120912E   | M   | 47  | 16       | 100 | 25.4 |
| RA12Jun12M* | F   | 82  | 12       | 154 | 5.3  |
| RA12Jun15J* | F   | 75  | 0        | 250 | 17.5 |
| RA12Jun15H* | F   | 72  | 81       | 172 | 4    |

Patients were treated with DMARDs

\* Patients were treated with DMARDs and TNF- $\alpha$  inhibitors

B)

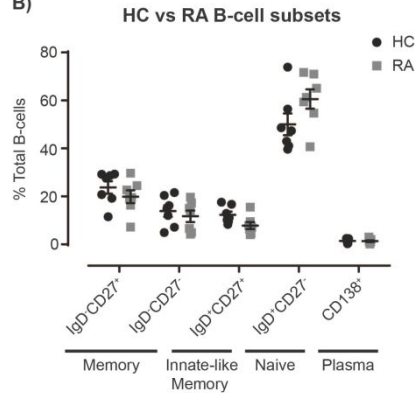

C)

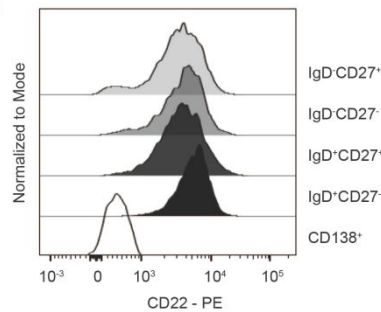

**Supplemental Figure 1. RA patient clinical characterization and B-cell subsets. A)**

Demographics of RA patients and their clinical characteristics, including sex, age, Rheumatoid Factor (RF, IU/mL), anti-citrullinated antibody (ACPA) titer (IU/mL), and health assessment questionnaire disability index (HAQ) (N=7 from 7 individual RA patients). **B)** Healthy control (HC) and Rheumatoid Arthritis (RA) patient B-cells were isolated from total PBMCs and assessed for differences in B-cell subsets by flow cytometry (IgD, CD22, IgG, CD38, CD138, CD20, IgM, CD27) (N=7 individual donors for RA and 7 matched HC donors, 7 independent experiments,

pooled data, unpaired t-test). **C)** A representative histogram for CD22 expression in B-cell subsets from an RA patient.

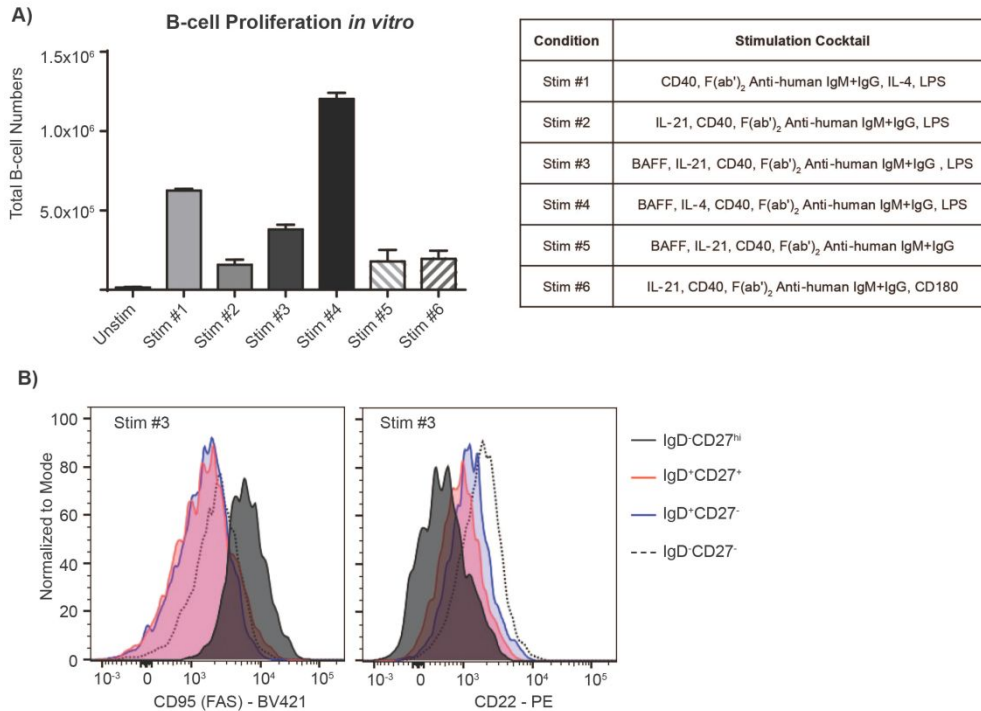

**Supplemental Figure 2. B-cell proliferation upon activation and further plasmablast B-cell characterization.** **A)** B-cells isolated from healthy control PBMCs were plated at  $2 \times 10^4$  cells/well and stimulated under a variety of stimulating conditions for 7 days using the following factors: F(ab')<sub>2</sub> anti-human IgG/IgM, BAFF, anti-human CD40, IL-4, IL-21, LPS, and CD180 as indicated in the table to the right. B-cell proliferation was measured by CellTiter-Glo (N=3 independent experiments from 3 individual healthy control donors, pooled data). **B)** B-cells were treated with Stim-3 and characterized further for a B-cell plasmablast phenotype by flow cytometry, CD95 and CD22 are shown (IgD, CD22, IgG, CD38, CD138, CD20, CD95 (FAS), and CD27) (N=3 independent experiments with 3 individual health donors).

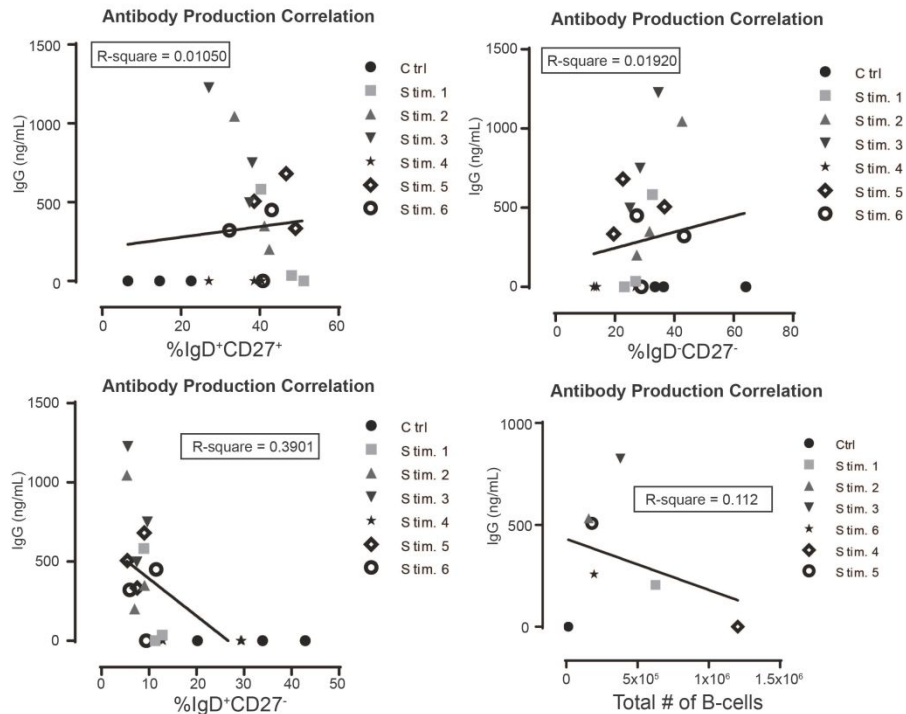

**Supplemental Figure 3. No positive linear correlation was found between antibody production and generation of B-cell subsets other than the subset IgD<sup>+</sup>CD27<sup>+</sup> B cells.** Total IgG antibody production was determined from culture supernatants of each of the above conditions (**Figure 1B**), each symbol represents a different healthy control sample (N=3 independent experiments from 3 individual healthy control donors, pooled data, linear regression). B-cells were also stained on day 7 for naïve (CD20<sup>+</sup>IgD<sup>+</sup>CD27<sup>-</sup>) and memory (CD20<sup>+</sup>IgD<sup>-</sup>CD27<sup>+</sup>) B-cell subsets and correlated to IgG production for the subsets shown above (Linear regression analysis) (N=3 independent experiments from 3 individual healthy control donors, pooled data, linear regression) and correlation to total B-cell proliferation.

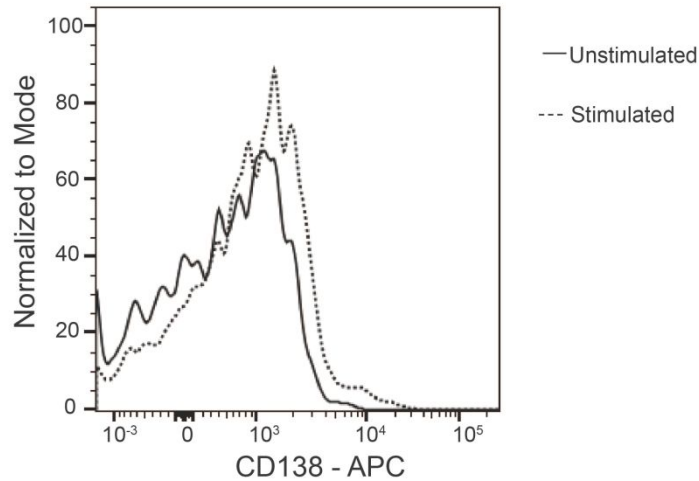

**Supplemental Figure 4. Unstimulated and Stimulated Cells do not express the surface marker CD138 after 7 days in culture.** B-cells isolated from healthy control PBMCs were plated at  $2 \times 10^5$  cells/well and were left unstimulated or stimulated under standard stimulating conditions for 7 days and characterized for analysis of B-cell plasmablast subset markers by flow cytometry (IgD, CD22, IgG, CD38, CD138, CD20, CD95 (FAS), and CD27) (N=3 independent experiments with 3 individual health donors). Plasma B cells were identified by cell surface marker CD138 in FACS analysis.

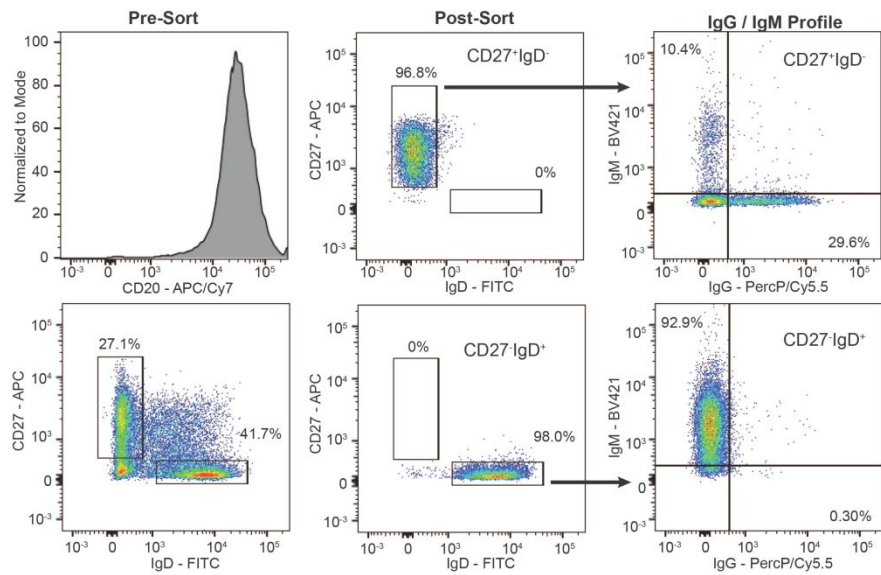

**Supplemental Figure 5. Sorting purity for naïve and memory B-cells.** B-cells were isolated from healthy control PBMCs and sorted using BDFacsAria™ for naïve or memory B-cells as described in Methods and Materials. Sorted naïve and memory B-cells were monitored for purity based on cell surface markers CD27, IgD, IgM and IgG. FACS analysis of purified B cells from a representative healthy donor was shown.

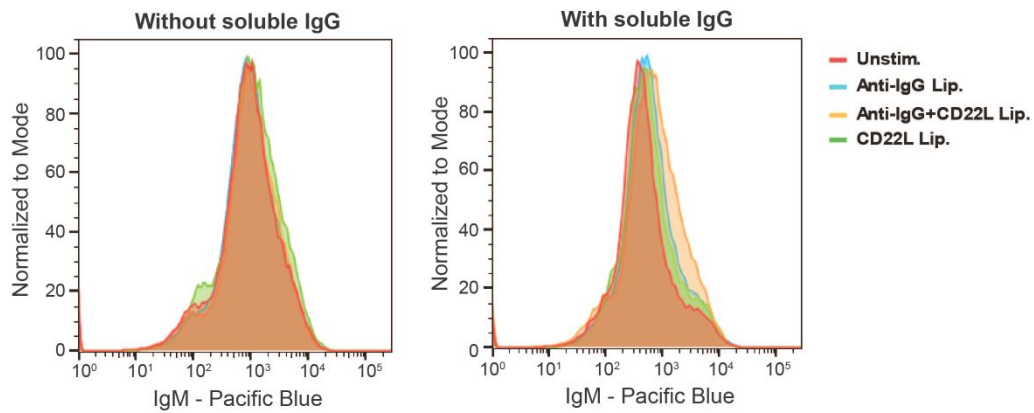

**Supplemental Figure 6. IgM expressing B-cells are unaffected by anti-human IgG STALs in the absence and presence of soluble IgG.** Human B-cells were isolated from healthy control PBMCs and plated at  $1 \times 10^5$ /well in 96-well plates under one of the following conditions: unstimulated (PBS), anti-human IgG-liposomes ( $\alpha$ IgG Lip), anti-human IgG+hCD22L ( $\alpha$ IgG STALs), or CD22L liposomes alone (CD22L Lip) for 24 hrs with or without soluble IgG (5ng/mL) as indicated in the figure. After 24hrs cells were stained for B-cell subsets, including IgM as shown above (Representative figure from N=10 or N=4 independent experiments).

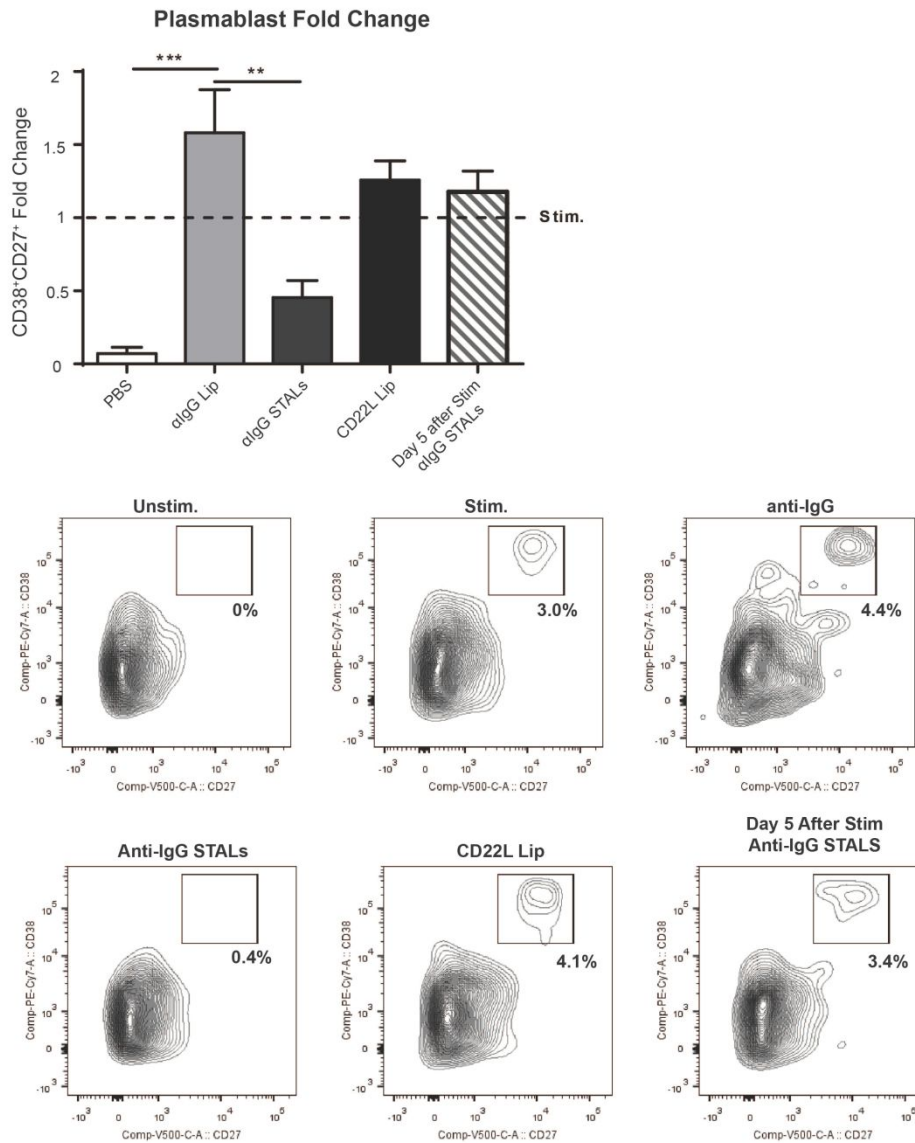

**Supplement Figure 7. Plasmablast-like B-cells are not inhibited by anti-IgG STALs after formation on Day 5.** Human B-cells were isolated from healthy control PBMCs and plated at  $1 \times 10^5$ /well in 96-well plate stimulated under standard stimulating conditions for 7 days and under one of the following conditions: unstimulated (PBS), anti-human IgG-liposomes ( $\alpha$ IgG Lip), anti-human IgG+hCD22L ( $\alpha$ IgG STALs), or CD22L liposomes alone (CD22L Lip) for the entirety of the study or anti-human IgG+hCD22L liposomes were added to the culture on day 5 when



generation of plasmablast-like B-cells in cultures were detectable (N=6 each an independent experiment, pooled data, one-way ANOVA with multiple comparisons). On day 7, each well was harvested for flow cytometry analysis of B-cell subsets as previously described (IgD, CD22, IgG, CD38, CD138, CD20, IgM, and CD27), representative plots are shown (N=6 each an independent experiment, pooled data, one-way ANOVA with multiple comparisons).

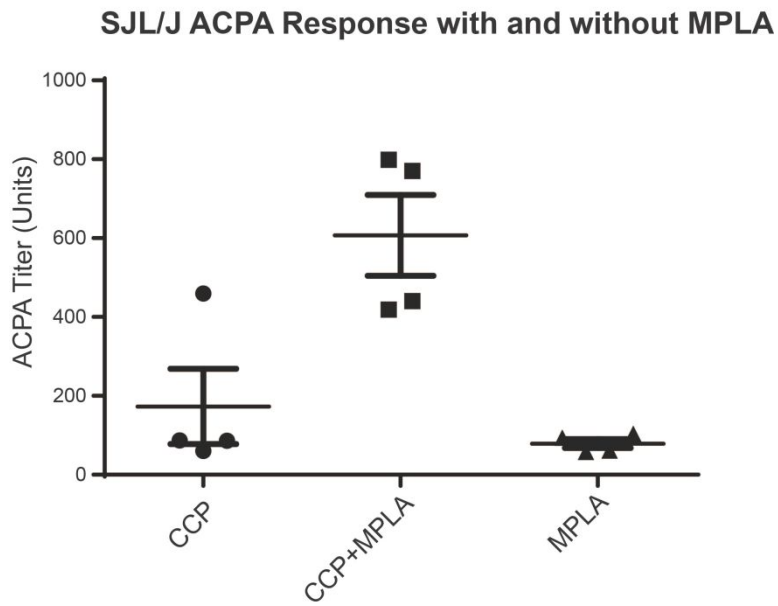

**Supplemental Figure 8. MPLA is necessary for ACPA titers in SJL/J mice.** SJL/J mice were immunized with liposomes decorated with CCP, CCP+MPLA or MPLA alone (N=4 mice from 2 independent experiments). ACPA titers in mouse serum were measured 7 days post-immunization using a CCP ELISA kit as described in Materials and Methods.
